# Supplementary material for: Genotype-phenotype correlations for pancreatic cancer risk in Dutch melanoma families with pathogenic CDKN2A variants
Source: PubMed Central journal article supplement (PMC8005797; doi:10.1136/jmedgenet-2019-106562), 2020-06-01
Supplement: jmedgenet-2019-106562supp001.pdf [file jmedgenet-2019-106562supp001.pdf]

Pathogenic *CDKN2A* variants and pancreatic cancer

## SUPPLEMENTARY

**SUPPLEMENTARY TABLE 1.** Overview of published families with variants in exon 1 $\beta$ .

| <i>CDKN2A</i> nucleotide change (exon 1 $\beta$ ) <sup>†</sup> | <i>CDKN2A</i> / p14ARF amino acid change | Total no. of families | PDAC reported in families            | References        |
|----------------------------------------------------------------|------------------------------------------|-----------------------|--------------------------------------|-------------------|
| c.45_60dup                                                     | p.(Val22Profs*46)                        | 1                     | Not described                        | [1]               |
| c.47G>A                                                        | p.(Gly16Asp)                             | 1                     | No                                   | [2]               |
| c.60ins16                                                      | insertion                                | 1                     | No                                   | [3]               |
| c.62G>A                                                        | p.(Arg21Lys)                             | 1 <sup>‡</sup>        | No                                   | [4]               |
| c.92C>T                                                        | p.(Thr31Met)                             | 1                     | No                                   | [5]               |
| c.81C>G                                                        | p.(Ile27Met)                             | 1                     | Not described                        | [1]               |
| c.102G>A                                                       | p.(Trp34*)                               | 1                     | Not described                        | [1]               |
| c.161G>A                                                       | p.(Arg54His)                             | 1                     | No                                   | [6, 7]            |
| c.192A>T                                                       | p.(Pro64Pro) (splicing)                  | 1                     | No                                   | [8, 9]            |
| c.193G>C                                                       | p.(Gly65Arg)                             | 8 <sup>‡, ¶</sup>     | No (7)<br>Not described (1)          | [1, 8, 10-12]     |
| c.193G>A                                                       | p.(Gly65Ser)                             | 2                     | No (1)<br>Not described (1)          | [1, 13]           |
| c.193+1G>C                                                     | p.? (splicing)                           | Not described         | Not described                        | [14]              |
| c.193+1G>A                                                     | p.? (splicing)                           | 9 <sup>‡, §</sup>     | No (8)<br>Not described (1)          | [6-9, 12, 15, 16] |
| c.193+2T>C                                                     | p.? (splicing)                           | 1 <sup>‡</sup>        | No                                   | [8, 9]            |
| 193+3A>G                                                       | p.? (splicing)                           | 1 <sup>‡</sup>        | No                                   | [8, 9]            |
| c.193+5G>A                                                     | p.? (splicing)                           | 2 <sup>‡</sup>        | No                                   | [4]               |
| deletion exon 1 $\beta$                                        | deletion exon 1 $\beta$                  | 3 <sup>‡</sup>        | No                                   | [2, 9, 17]        |
| <b>Total</b>                                                   |                                          | <b>35</b>             | <b>No (29)<br/>Not described (6)</b> |                   |

<sup>†</sup> RefSeq NM\_058195.3 isoform p14ARF.

<sup>‡</sup> Variant is also reported in Taylor *et al* 2016[18] and Taylor *et al* 2017[14], but the number of families in which the variant was found was not described (and possibly overlaps with other studies).

<sup>¶</sup> Includes 4 families that were reported by Potjer *et al* 2019[12] and are included in the current study.

<sup>§</sup> Includes 5 families that were reported by Potjer *et al* 2019[12] and are included in the current study.

Pathogenic *CDKN2A* variants and pancreatic cancer

## SUPPLEMENTARY

**SUPPLEMENTARY TABLE 2.** Overview of published families with variants in exon 2 that solely affect p14ARF.

| CDKN2A nucleotide change (exon 2) <sup>†</sup> | CDKN2A / p16INK4a amino acid change | CDKN2A / p14ARF amino acid change | Total no. of families | PDAC reported in families                                                       | References            |
|------------------------------------------------|-------------------------------------|-----------------------------------|-----------------------|---------------------------------------------------------------------------------|-----------------------|
| c.174A>C                                       | p.(Arg58=)                          | p.(Ser73Arg)                      | 1                     | Not described                                                                   | [19-21]               |
| c.192G>A                                       | p.(Leu64=)                          | p.(Ala79Thr)                      | 1 <sup>‡</sup>        | Not described                                                                   | [14, 19, 22]          |
| c.192G>C                                       | p.(Leu64=)                          | p.(Ala79Pro)                      | 1                     | Found in sporadic PDAC patient                                                  | [23, 24]              |
| c.198C>T                                       | p.(His66=)                          | p.(Arg81Trp)                      | 1 <sup>‡</sup>        | No                                                                              | [14, 18, 25]          |
| c.225C>T                                       | p.(Pro75=)                          | p.(Arg90Cys)                      | 1                     | Found in sporadic PDAC patient                                                  | [24]                  |
| c.267C>A                                       | p.(Gly89=)                          | p.(Leu104Ile)                     | 1                     | Not described                                                                   | [22]                  |
| c.294C>T                                       | p.(His98=)                          | p.(Pro113Ser)                     | 2                     | Not described                                                                   | [16]                  |
| c.306G>A                                       | p.(Ala102=)                         | p.(Ala117Thr)                     | 1                     | Not described                                                                   | [19, 21]              |
| c.318G>A                                       | p.(Val106=)                         | p.(Ala121Thr)                     | 12 <sup>‡</sup>       | Found in sporadic PDAC patient (1)<br>No (4)<br>Not described (7)               | [1, 14, 18-24, 26-28] |
| c.339G>A                                       | p.(Leu113=)                         | p.(Ala128Thr)                     | 8                     | Not described (4)<br>No (2) <sup>¶</sup><br>Yes (2) <sup>¶</sup>                | [9, 16, 22, 29-31]    |
| c.339G>C                                       | p.(Leu113=)                         | p.(Ala128Pro)                     | Not described         | Not described                                                                   | [14, 18]              |
| <b>Total</b>                                   |                                     |                                   | <b>29</b>             | <b>No (7)<br/>Not described (17)<br/>Found in sporadic PDAC (3)<br/>Yes (2)</b> |                       |

<sup>†</sup> RefSeq NM\_000077.4 isoform p16INK4a

<sup>‡</sup> Variant is also reported in Taylor *et al* 2016[18] and Taylor *et al* 2017[14], but the number of families in which the variant was found was not described (and possibly overlaps with other studies).

<sup>¶</sup> In the families reported by Kannengiesser *et al* 2009[30], the variant c.339G>C co-occurred with variant c.340C>T which has an effect on p16INK4a (p.Pro114Ser)

Pathogenic *CDKN2A* variants and pancreatic cancer

## SUPPLEMENTARY

## REFERENCES

1. Harland M, Cust AE, Badenas C, Chang YM, Holland EA, Aguilera P, Aitken JF, Armstrong BK, Barrett JH, Carrera C, Chan M, Gascoyne J, Giles GG, Agha-Hamilton C, Hopper JL, Jenkins MA, Kanetsky PA, Kefford RF, Kolm I, Lowery J, Malvey J, Ogbah Z, Puig-Butille JA, Orihuela-Segales J, Randerson-Moor JA, Schmid H, Taylor CF, Whitaker L, Bishop DT, Mann GJ, Newton-Bishop JA, Puig S (2014) Prevalence and predictors of germline *CDKN2A* mutations for melanoma cases from Australia, Spain and the United Kingdom. *Hered Cancer Clin Pract* 12(1):20. 10.1186/1897-4287-12-20
2. Laud K, Marian C, Avril MF, Barrois M, Chompret A, Goldstein AM, Tucker MA, Clark PA, Peters G, Chaudru V, Demenais F, Spatz A, Smith MW, Lenoir GM, Bressac-de Paillerets B, French Hereditary Melanoma Study G (2006) Comprehensive analysis of *CDKN2A* (p16INK4A/p14ARF) and *CDKN2B* genes in 53 melanoma index cases considered to be at heightened risk of melanoma. *J Med Genet* 43(1):39-47. 10.1136/jmg.2005.033498
3. Rizos H, Puig S, Badenas C, Malvey J, Darmanian AP, Jimenez L, Mila M, Kefford RF (2001) A melanoma-associated germline mutation in exon 1beta inactivates p14ARF. *Oncogene* 20(39):5543-7. 10.1038/sj.onc.1204728
4. Wadt KA, Aoude LG, Krogh L, Sunde L, Bojesen A, Gronskov K, Wartacz N, Ek J, Tolstrup-Andersen M, Klarskov-Andersen M, Borg A, Heegaard S, Kiilgaard JF, Hansen TV, Klein K, Jonsson G, Drzewiecki KT, Duno M, Hayward NK, Gerdes AM (2015) Molecular characterization of melanoma cases in Denmark suspected of genetic predisposition. *PLoS One* 10(3):e0122662. 10.1371/journal.pone.0122662
5. Pellegrini C, Maturo MG, Martorelli C, Suppa M, Antonini A, Kostaki D, Verna L, Landi MT, Peris K, Fargnoli MC (2017) Characterization of melanoma susceptibility genes in high-risk patients from Central Italy. *Melanoma Res* 27(3):258-267. 10.1097/CMR.0000000000000323
6. Binni F, Antogni I, De Simone P, Majore S, Silipo V, Crisi A, Amantea A, Pacchiarini D, Castori M, De Bernardo C, Catricala C, Grammatico P (2010) Novel and recurrent p14 mutations in Italian familial melanoma. *Clin Genet* 77(6):581-6. 10.1111/j.1399-0004.2009.01298.x
7. Pedace L, De Simone P, Castori M, Sperduti I, Silipo V, Eibenschutz L, De Bernardo C, Buccini P, Moscarella E, Panetta C, Ferrari A, Grammatico P, Catricala C (2011) Clinical features predicting identification of *CDKN2A* mutations in Italian patients with familial cutaneous melanoma. *Cancer Epidemiol* 35(6):e116-20. 10.1016/j.canep.2011.07.007
8. Harland M, Taylor CF, Chambers PA, Kukalich K, Randerson-Moor JA, Gruis NA, de Snoo FA, ter Huurne JA, Goldstein AM, Tucker MA, Bishop DT, Bishop JA (2005) A mutation hotspot at the p14ARF splice site. *Oncogene* 24(28):4604-8. 10.1038/sj.onc.1208678
9. Goldstein AM, Chan M, Harland M, Gillanders EM, Hayward NK, Avril MF, Azizi E, Bianchi-Scarra G, Bishop DT, Bressac-de Paillerets B, Bruno W, Calista D, Cannon Albright LA, Demenais F, Elder DE, Ghorzo P, Gruis NA, Hansson J, Hogg D, Holland EA, Kanetsky PA, Kefford RF, Landi MT, Lang J, Leachman SA, Mackie RM, Magnusson V, Mann GJ, Niendorf K, Newton Bishop J, Palmer JM, Puig S, Puig-Butille JA, de Snoo FA, Stark M, Tsao H, Tucker MA, Whitaker L, Yakobson E (2006) High-risk melanoma susceptibility genes and pancreatic cancer, neural system tumors, and uveal melanoma across GenoMEL. *Cancer Res* 66(20):9818-28. 10.1158/0008-5472.can-06-0494
10. Hewitt C, Lee Wu C, Evans G, Howell A, Elles RG, Jordan R, Sloan P, Read AP, Thakker N (2002) Germline mutation of ARF in a melanoma kindred. *Hum Mol Genet* 11(11):1273-9. 10.1093/hmg/11.11.1273
11. Garcia-Casado Z, Nagore E, Fernandez-Serra A, Botella-Estrada R, Lopez-Guerrero JA (2009) A germline mutation of p14/ARF in a melanoma kindred. *Melanoma Res* 19(5):335-7. 10.1097/CMR.0b013e32832dd2d4
12. Potjer TP, Helgadottir H, Leenheer M, van der Stoep N, Gruis NA, Hoiom V, Olsson H, van Doorn R, Vasen HFA, van Asperen CJ, Dekkers OM, Hes FJ, Dutch Working Group for Clinical O (2018) CM-Score: a validated scoring system to predict *CDKN2A* germline mutations in melanoma families from Northern Europe. *J Med Genet* 55(10):661-668. 10.1136/jmedgenet-2017-105205
13. McInerney-Leo AM, Wheeler L, Sturm RA, Tan JM, Harris JE, Anderson L, Jagirdar K, Brown MA, Leo PJ, Soyer HP, Duncan EL (2018) Point mutation in p14(ARF) -specific exon 1beta of

Pathogenic *CDKN2A* variants and pancreatic cancer

## SUPPLEMENTARY

- CDKN2A causing familial melanoma and astrocytoma. *Br J Dermatol* 178(4):e263-e264. 10.1111/bjd.16275
14. Taylor NJ, Mitra N, Goldstein AM, Tucker MA, Avril MF, Azizi E, Bergman W, Bishop DT, Bressac-de Paillerets B, Bruno W, Calista D, Cannon-Albright LA, Cuellar F, Cust AE, Demenais F, Elder DE, Gerdes AM, Ghorzo P, Grazziotin TC, Hansson J, Harland M, Hayward NK, Hocevar M, Hoiom V, Ingvar C, Landi MT, Landman G, Larre-Borges A, Leachman SA, Mann GJ, Nagore E, Olsson H, Palmer JM, Peric B, Pjanova D, Pritchard A, Puig S, van der Stoep N, Wadt KAW, Whitaker L, Yang XR, Newton Bishop JA, Gruis NA, Kanetsky PA, Geno MELSG (2017) Germline Variation at *CDKN2A* and Associations with Nevus Phenotypes among Members of Melanoma Families. *J Invest Dermatol* 137(12):2606-2612. 10.1016/j.jid.2017.07.829
  15. Ghorzo P, Pastorino L, Pizzichetta MA, Bono R, Queirolo P, Talamini R, Annessi G, Bruno W, Nasti S, Gargiulo S, Battistuzzi L, Sini MC, Palmieri G, Scarra GB, Italian Melanoma I (2009) *CDKN2A* and *MC1R* analysis in amelanotic and pigmented melanoma. *Melanoma Res* 19(3):142-5. 10.1097/CMR.0b013e32832a1e18
  16. Bruno W, Pastorino L, Ghorzo P, Andreotti V, Martinuzzi C, Menin C, Elefanti L, Stagni C, Vecchiato A, Rodolfo M, Maurichi A, Manoukian S, De Giorgi V, Savarese I, Gensini F, Borgognoni L, Testori A, Spadola G, Mandala M, Imberti G, Savoia P, Astrua C, Ronco AM, Farnetti A, Tibiletti MG, Lombardo M, Palmieri G, Ayala F, Ascierio P, Ghigliotti G, Muggianu M, Spagnolo F, Picasso V, Tanda ET, Queirolo P, Bianchi-Scarra G (2016) Multiple primary melanomas (MPMs) and criteria for genetic assessment: MultiMEL, a multicenter study of the Italian Melanoma Intergroup. *J Am Acad Dermatol* 74(2):325-32. 10.1016/j.jaad.2015.09.053
  17. Randerson-Moor JA, Harland M, Williams S, Cuthbert-Heavens D, Sheridan E, Aveyard J, Sibley K, Whitaker L, Knowles M, Bishop JN, Bishop DT (2001) A germline deletion of *p14(ARF)* but not *CDKN2A* in a melanoma-neural system tumour syndrome family. *Hum Mol Genet* 10(1):55-62. 10.1093/hmg/10.1.55
  18. Taylor NJ, Handorf EA, Mitra N, Avril MF, Azizi E, Bergman W, Bianchi-Scarra G, Bishop DT, Bressac-de Paillerets B, Calista D, Cannon-Albright LA, Cuellar F, Cust AE, Demenais F, Elder DE, Friedman E, Gerdes AM, Ghorzo P, Goldstein AM, Grazziotin TC, Hansson J, Hayward NK, Hocevar M, Hoiom V, Holland EA, Ingvar C, Landi MT, Landman G, Larre-Borges A, Leachman SA, Mann GJ, Nagore E, Olsson H, Palmer J, Peric B, Pjanova D, Puig S, Schmid H, van der Stoep N, Tucker MA, Wadt KAW, Whitaker L, Yang XR, Newton Bishop JA, Gruis NA, Kanetsky PA, Geno MELC (2016) Phenotypic and Histopathological Tumor Characteristics According to *CDKN2A* Mutation Status among Affected Members of Melanoma Families. *J Invest Dermatol* 136(5):1066-1069. 10.1016/j.jid.2016.01.009
  19. Begg CB, Orlow I, Hummer AJ, Armstrong BK, Krickler A, Marrett LD, Millikan RC, Gruber SB, Anton-Culver H, Zanetti R, Gallagher RP, Dwyer T, Rebbeck TR, Mitra N, Busam K, From L, Berwick M, Genes E, Melanoma Study G (2005) Lifetime risk of melanoma in *CDKN2A* mutation carriers in a population-based sample. *J Natl Cancer Inst* 97(20):1507-15. 10.1093/jnci/dji312
  20. Berwick M, Orlow I, Hummer AJ, Armstrong BK, Krickler A, Marrett LD, Millikan RC, Gruber SB, Anton-Culver H, Zanetti R, Gallagher RP, Dwyer T, Rebbeck TR, Kanetsky PA, Busam K, From L, Mujumdar U, Wilcox H, Begg CB (2006) The prevalence of *CDKN2A* germ-line mutations and relative risk for cutaneous malignant melanoma: an international population-based study. *Cancer Epidemiol Biomarkers Prev* 15(8):1520-5. 10.1158/1055-9965.Epi-06-0270
  21. Orlow I, Begg CB, Cotignola J, Roy P, Hummer AJ, Clas BA, Mujumdar U, Canchola R, Armstrong BK, Krickler A, Marrett LD, Millikan RC, Gruber SB, Anton-Culver H, Zanetti R, Gallagher RP, Dwyer T, Rebbeck TR, Kanetsky PA, Wilcox H, Busam K, From L, Berwick M, Group GEMS (2007) *CDKN2A* germline mutations in individuals with cutaneous malignant melanoma. *J Invest Dermatol* 127(5):1234-43. 10.1038/sj.jid.5700689
  22. FitzGerald MG, Harkin DP, Silva-Arrieta S, MacDonald DJ, Lucchina LC, Unsal H, O'Neill E, Koh J, Finkelstein DM, Isselbacher KJ, Sober AJ, Haber DA (1996) Prevalence of germ-line mutations in *p16*, *p19ARF*, and *CDK4* in familial melanoma: analysis of a clinic-based population. *Proc Natl Acad Sci U S A* 93(16):8541-5. 10.1073/pnas.93.16.8541

Pathogenic *CDKN2A* variants and pancreatic cancer

## SUPPLEMENTARY

23. McWilliams RR, Wieben ED, Rabe KG, Pedersen KS, Wu Y, Sicotte H, Petersen GM (2011) Prevalence of *CDKN2A* mutations in pancreatic cancer patients: implications for genetic counseling. *Eur J Hum Genet* 19(4):472-8. 10.1038/ejhg.2010.198
24. McWilliams RR, Wieben ED, Chaffee KG, Antwi SO, Raskin L, Olopade OI, Li D, Highsmith WE, Jr., Colon-Otero G, Khanna LG, Permuth JB, Olson JE, Frucht H, Genkinger J, Zheng W, Blot WJ, Wu L, Almada LL, Fernandez-Zapico ME, Sicotte H, Pedersen KS, Petersen GM (2018) *CDKN2A* Germline Rare Coding Variants and Risk of Pancreatic Cancer in Minority Populations. *Cancer Epidemiol Biomarkers Prev* 27(11):1364-1370. 10.1158/1055-9965.epi-17-1065
25. Stratigos AJ, Yang G, Dimisianos R, Nicolaou V, Stefanaki I, Katsambas AD, Tsao H (2006) Germline *CDKN2A* mutations among Greek patients with early-onset and multiple primary cutaneous melanoma. *J Invest Dermatol* 126(2):399-401. 10.1038/sj.jid.5700078
26. Aoude LG, Gartside M, Johansson P, Palmer JM, Symmons J, Martin NG, Montgomery GW, Hayward NK (2015) Prevalence of Germline *BAP1*, *CDKN2A*, and *CDK4* Mutations in an Australian Population-Based Sample of Cutaneous Melanoma Cases. *Twin Res Hum Genet* 18(2):126-33. 10.1017/thg.2015.12
27. Burgstaller-Muehlbacher S, Marko M, Muller C, Wendt J, Pehamberger H, Okamoto I (2015) Novel *CDKN2A* mutations in Austrian melanoma patients. *Melanoma Res* 25(5):412-20. 10.1097/CMR.0000000000000179
28. Erlandson A, Appelqvist F, Wennberg AM, Holm J, Enerback C (2007) Novel *CDKN2A* mutations detected in western Swedish families with hereditary malignant melanoma. *J Invest Dermatol* 127(6):1465-7. 10.1038/sj.jid.5700718
29. Kannengiesser C, Dalle S, Leccia MT, Avril MF, Bonadona V, Chompret A, Lasset C, Leroux D, Thomas L, Lesueur F, Lenoir G, Sarasin A, Bressac-de Paillerets B (2007) New founder germline mutations of *CDKN2A* in melanoma-prone families and multiple primary melanoma development in a patient receiving levodopa treatment. *Genes Chromosomes Cancer* 46(8):751-60. 10.1002/gcc.20461
30. Kannengiesser C, Brookes S, del Arroyo AG, Pham D, Bombled J, Barrois M, Mauffret O, Avril MF, Chompret A, Lenoir GM, Sarasin A, French Hereditary Melanoma Study G, Peters G, Bressac-de Paillerets B (2009) Functional, structural, and genetic evaluation of 20 *CDKN2A* germ line mutations identified in melanoma-prone families or patients. *Hum Mutat* 30(4):564-74. 10.1002/humu.20845
31. Goldstein AM, Chan M, Harland M, Hayward NK, Demenais F, Bishop DT, Azizi E, Bergman W, Bianchi-Scarra G, Bruno W, Calista D, Albright LA, Chaudru V, Chompret A, Cuellar F, Elder DE, Ghiorzo P, Gillanders EM, Gruis NA, Hansson J, Hogg D, Holland EA, Kanetsky PA, Kefford RF, Landi MT, Lang J, Leachman SA, MacKie RM, Magnusson V, Mann GJ, Bishop JN, Palmer JM, Puig S, Puig-Butille JA, Stark M, Tsao H, Tucker MA, Whitaker L, Yakobson E (2007) Features associated with germline *CDKN2A* mutations: a GenoMEL study of melanoma-prone families from three continents. *J Med Genet* 44(2):99-106. 10.1136/jmg.2006.043802
